# Supplementary material for: Mammalian Roadkill in a Semi-Arid Region of Brazil: Species, Landscape Patterns, Seasonality, and Hotspots
Source: MDPI journal article supplement (doi:10.3390/d15060780), 2023-06-16
Supplement: s1 [file s1]

# APPENDIX SA – Table of two-dimensional Ripley's K-Statistics and Hotspot Tests.

**Table S1.** Results obtained from the analysis of the K- Ripley 2D estatistic and 2D Hotspots tests, for the general class of wild mammals and for the species *Cerdocyon thous*, *Procyon cancrivorus* and *Euphractus sexcinctus*, considering the temporal scale (the entire sampling period, annually and dry and rainy period) and spatially (BR427, RN118 and RN288).

| Roads | Group/<br>Species                | Season/year | K- Ripley<br>test | 2D HotSpot test                                                                                                                                               |
|-------|----------------------------------|-------------|-------------------|---------------------------------------------------------------------------------------------------------------------------------------------------------------|
| BR427 | Mammals                          | All         | 100m              | Km7.2 to 7.5, Km8.9 to 9.3, Km19.9 to 20.2, Km29.7 to 30.2, Km33.2 to 33.3                                                                                    |
|       |                                  | 2014        | 300m              | Km0.8, Km1.8, Km4.3, Km4.5, Km9.2, Km9.7, Km11.2 to 11.3, Km18.6, Km19.9 to 20.2, Km38.5, Km39.2                                                              |
|       |                                  | 2015        | 100m              | Km7.1 to 7.4, Km7.7, Km 7.9, Km20.1 to 20.4, Km31.3 to 31.4, Km32.4 to 32.6, Km33.2 to 33.5, Km35.8 to 36.1, Km37.8                                           |
|       |                                  | 2016        | 100m              | Km9, Km19.9 to 20, Km 26.4 to 26.7, Km29.9 to 30.2, Km34.5 to 34.7, Km36.7 to 36.9, Km 37.1 to 37.3, Km39.7 to 39.9, Km 42 to 42.2                            |
|       |                                  | 2017        | 22200m            | Km7 to 9, Km11.8 to13                                                                                                                                         |
|       |                                  | Rainy       | 2000m             | Km7.2 to 9.7, Km10.7 to 11, Km31.4 to 31.8, Km35 to 35.5; Km37.9 to 38.1                                                                                      |
|       | <i>Cerdocyon<br/>thous</i>       | All         | 100m              | Km6.7, Km7.1 to 7.7, Km8, Km9.7, km13.2, Km16.3, Km28.4, Km33.3, Km35.5                                                                                       |
|       |                                  | 2014        | 2000m             | Km4.5 to 6.5, Km7.5 to 9.3, Km11.3 to 11.7, Km13 to 13.8, Km 14.5 to 15.3                                                                                     |
|       |                                  | 2015        | 100m              | Km7 to 7.5, Km8, Km10.3 to 10.6, Km12, km16.4, Km22.7 to 22.8, Km24.8, km25.3, km27.4, km28.3, km28.5, km32.8, km33.2, km37.6, km39.3, km40.9, km41.7, km42.3 |
|       |                                  | 2016        | 300m              | Km7.2 to 7.5, Km14, km16.3, Km24.4 to 24.7, Km30.4, km34.2 to 34.6                                                                                            |
|       |                                  | 2017        | 100m              | Km6.7, Km7.4, km7.6, km8, km13.2, km16.6, Km18.3, Km28.3, Km31.6, Km35, Km35.4, Km38.5, Km39.5                                                                |
|       |                                  | Rainy       | 100m              | Km7.3 to 7.6, Km8, Km10.3, km10.5, km27.4, km28.3, km38.3, Km39.3                                                                                             |
|       |                                  | Dry         | 100m              | km6.8, Km7.2, km9.6, Km13.3, Km16.4, km17.7, km33.2, km42.2                                                                                                   |
|       | <i>Procyon<br/>cancrivorus</i>   | All         | 100m              | Km2.4, Km4.4, Km7.3, km9.7, Km20.2, Km33.4, km36.2                                                                                                            |
|       |                                  | Rainy       | 100m              | km1.9, km4.4, km7.3, km9.6, km20.3, km33.4, km34.5, km37.6                                                                                                    |
|       | <i>Euphractus<br/>sexcinctus</i> | Todos       | 100m              | Km14.9, km30, km34.7, km37                                                                                                                                    |
| RN118 | <i>Cerdocyon<br/>thous</i>       | All         | 100m              | Km4.3, Km10.3, Km20.5, Km25.3                                                                                                                                 |
|       |                                  | 2014        | 26500m            | Km0.7 to 2                                                                                                                                                    |
|       |                                  | 2015        | 9Km               | Km4 to 4.1, Km8.8 to 9.3, Km9.4, Km9.6 to10, Km10.9 to 11.1, Km11.2 to 13.3                                                                                   |
|       |                                  | 2017        | 100m              | Km20.4, Km24.8, 25.2                                                                                                                                          |
|       |                                  | Rainy       | 100m              | Km18.2, Km20.4, Km25.2                                                                                                                                        |
|       |                                  | Dry         | 100m              | Km2.2, Km4.2, Km10.3, Km24.9, Km25.3, Km28.3                                                                                                                  |
| RN288 | Mammals                          | All         | 100m              | Km0.5 to 0.8, Km 2.3 to 2.5, Km2.9 to 3.1, Km4.3 to 4.5, Km24.4 to 24.6, Km26.9 to 27, Km30.9 to 31.2, Km31.6 to 31.9                                         |
|       |                                  | 2014        | 2500m             | Km0.2 to 2.7                                                                                                                                                  |
|       |                                  | 2017        | 100m              | Km1.1 to 1.3, Km2.9 to 3.2, Km31.7 to 31.8, Km32.4 to 32.6                                                                                                    |

|                                |       |       |                                                                                       |
|--------------------------------|-------|-------|---------------------------------------------------------------------------------------|
| <i>Cerdocyon<br/>thous</i>     | Rainy | 3000m | Km0 to 3.3, Km4 to 4.5, Km5.2 to 5.5                                                  |
|                                | Dry   | 100m  | Km0.4 to 0.6, Km 2.3 to 2.6, Km2.8 to 3.2, Km30.9 to 31.2,<br>Km31.6 to 31.9          |
|                                | All   | 100m  | Km1.2, Km1.5, Km2.1, Km24.5, Km30.5, Km32.8                                           |
|                                | 2014  | 1000m | Km0.5 to 1.1, Km1.2 to 1.5, Km15.5, Km16.3, Km25.3, Km30.8                            |
|                                | 2015  | 100m  | Km1.2, Km1.6, Km2.6, Km4.8, Km17.9, Km24.6                                            |
|                                | Rainy | 100m  | Km1.1 to 1.2, Km1.4 to 1.6, Km2.3, Km4.8, Km19.2, Km19.4,<br>Km24.5, Km32.8           |
|                                | Dry   | 100m  | Km1.1 to 1.6, Km7.3, Km8.2, Km17.9, Km24.5, Km27.7, Km30.6,<br>Km31.8, Km32.5, Km32.8 |
|                                | All   | 100m  | Km31.7                                                                                |
| <i>Procyon<br/>cancrivorus</i> | Dry   | 100m  | Km1.3, Km20.2, Km24.5, Km28.5, Km31,7                                                 |

**APPENDIX SB – Table: monthly precipitation (mm) in the study region.**

**Table S2.** Monthly precipitation (in mm) from the meteorological station called "Açude Mundo Novo" of *Empresa de Pesquisa Agropecuária do Rio Grande do Norte (EMPARN)*, Caicó, Seridó - Rio Grande do Norte, Brazil.

| <b>Year</b> | <b>Jan</b> | <b>Feb</b> | <b>Mar</b> | <b>Apr</b> | <b>May</b> | <b>Jun</b> | <b>Jul</b> | <b>Aug</b> | <b>Sept</b> | <b>Oct</b> | <b>Nov</b> | <b>Dec</b> |
|-------------|------------|------------|------------|------------|------------|------------|------------|------------|-------------|------------|------------|------------|
| <b>2007</b> | 0.0        | 163.8      | 92         | 136.3      | 30.5       | 21.2       | 3          | 0.0        | 0.0         | 0.0        | 0.0        | 0.0        |
| <b>2008</b> | 60.6       | 101.7      | 318.7      | 178.2      | 86.5       | 17.8       | 3.2        | 0.0        | 0.0         | 0.0        | 0.0        | 0.0        |
| <b>2009</b> | 38         | 194.1      | 241.8      | 213.4      | 112.5      | 40.8       | 25.6       | 22.3       | 0.0         | 0.0        | 0.0        | 33.1       |
| <b>2010</b> | 100.1      | 56.8       | 75.8       | 101.4      | 12.2       | 85.1       | 0.0        | 0.0        | 0.0         | 66.9       | 0.0        | 0.0        |
| <b>2011</b> | 49.9       | 176.4      | 53.7       | 320.5      | 125.1      | 37.5       | 46.2       | 0.0        | 0.0         | 0.0        | 0.0        | 0.0        |
| <b>2012</b> | 37         | 70.9       | 23.4       | 0.0        | 3.5        | 44         | 0.0        | 0.0        | 0.0         | 0.0        | 5          | 5          |
| <b>2013</b> | 31         | 12.5       | 93.5       | 171.2      | 71.3       | 14.8       | 14.8       | 0.0        | 0.0         | 0.0        | 30         | 30         |
| <b>2014</b> | 23.1       | 87.2       | 127.3      | 17.6       | 105        | 4.5        | 2.4        | 0.0        | 2.3         | 0.0        | 0.0        | 0.0        |
| <b>2015</b> | 0.0        | 45.7       | 117.5      | 119.6      | 0.0        | 0.0        | 19         | 0.0        | 0.0         | 0.0        | 0.0        | 0.0        |
| <b>2016</b> | 136        | 34.8       | 51.5       | 90.5       | 13         | 28         | 0.0        | 0.0        | 0.0         | 0.0        | 0.0        | 12         |
| <b>2017</b> | 8          | 107.5      | 111        | 98         | 33         | 22         | 20         | 0.0        | 0.0         | 0.0        | 0.0        | 0.0        |
| <b>2018</b> | 3          | 75         | 134        | 215.5      | 34         | 0.0        | 0.0        | 0.0        | 0.0         | 0.0        | 0.0        | 19         |
| <b>2019</b> | 118        | 82         | 246.5      | 131.5      | 45         | 12         | 18.5       | 0.0        | 0.0         | 0.0        | 0.0        | 14.1       |
| <b>2020</b> | 69.8       | 147.9      | 117.8      | 132        | 45.6       | 23         | 14.5       | 0.0        | 0.8         | 0.0        | 9          | 34.2       |

**APPENDIX SC – Table of details of acquired satellite images.**

**Table S3.** Data obtained from satellite images used in the research to develop classified analyzes of land use and occupation. Due to the location of the study area, it was necessary to obtain four satellite images to develop the spatial analysis in each corresponding season and year.

| DATE       | SEASON | DATA SET ID                              | PLATFORM |
|------------|--------|------------------------------------------|----------|
| 2014/05/19 | RAINY  | LC08_L1TP_215064_20140519_20200911_02_T1 | USGS     |
| 2014/05/19 | RAINY  | LC08_L1TP_215065_20140519_20200911_02_T1 | USGS     |
| 2014/05/26 | RAINY  | LC08_L1TP_216064_20140526_20200911_02_T1 | USGS     |
| 2014/05/26 | RAINY  | LC08_L1TP_216065_20140526_20200911_02_T1 | USGS     |
| 2014/08/14 | DRY    | LC08_L1TP_216064_20140526_20200814_02_T1 | USGS     |
| 2014/08/14 | DRY    | LC08_L1TP_216065_20140526_20200814_02_T1 | USGS     |
| 2014/08/23 | DRY    | LC08_L1TP_215064_20140823_20200911_02_T1 | USGS     |
| 2014/08/23 | DRY    | LC08_L1TP_215065_20140823_20200911_02_T1 | USGS     |
| 2015/05/06 | RAINY  | LC08_L1TP_215064_20150506_20200909_02_T1 | USGS     |
| 2015/05/06 | RAINY  | LC08_L1TP_215065_20150506_20200909_02_T1 | USGS     |
| 2015/05/13 | RAINY  | LC08_L1TP_216064_20150513_20200909_02_T1 | USGS     |
| 2015/05/13 | RAINY  | LC08_L1TP_216065_20150513_20200909_02_T1 | USGS     |
| 2015/11/14 | DRY    | LC08_L1TP_215064_20151114_20200908_02_T1 | USGS     |
| 2015/11/14 | DRY    | LC08_L1TP_215065_20151114_20200908_02_T1 | USGS     |
| 2015/11/21 | DRY    | LC08_L1TP_216064_20151121_20200908_02_T1 | USGS     |
| 2015/11/21 | DRY    | LC08_L1TP_216065_20151121_20200908_02_T1 | USGS     |
| 2016/05/08 | RAINY  | LC08_L1TP_215064_20160508_20200907_02_T1 | USGS     |
| 2016/05/08 | RAINY  | LC08_L1TP_215065_20160508_20200907_02_T1 | USGS     |
| 2016/05/15 | RAINY  | LC08_L1TP_216064_20160515_20200907_02_T1 | USGS     |
| 2016/05/15 | RAINY  | LC08_L1TP_216065_20160515_20200907_02_T1 | USGS     |
| 2016/09/20 | DRY    | LC08_L1TP_216064_20160920_20200906_02_T1 | USGS     |
| 2016/09/20 | DRY    | LC08_L1TP_216065_20160920_20200906_02_T1 | USGS     |
| 2016/09/29 | DRY    | LC08_L1TP_215064_20160929_20200906_02_T1 | USGS     |
| 2016/09/29 | DRY    | LC08_L1TP_215064_20160929_20200906_02_T1 | USGS     |
| 2017/05/02 | RAINY  | LC08_L1TP_215064_20170511_20200904_02_T1 | USGS     |
| 2017/05/02 | RAINY  | LC08_L1TP_215065_20170511_20200904_02_T1 | USGS     |
| 2017/05/11 | RAINY  | LC08_L1TP_216064_20170502_20200904_02_T1 | USGS     |
| 2017/05/11 | RAINY  | LC08_L1TP_216065_20170502_20200904_02_T1 | USGS     |
| 2017/11/19 | DRY    | LC08_L1TP_215064_20171119_20200902_02_T1 | USGS     |
| 2017/11/19 | DRY    | LC08_L1TP_215065_20171119_20200902_02_T1 | USGS     |
| 2017/11/26 | DRY    | LC08_L1TP_216064_20171126_20200902_02_T1 | USGS     |
| 2017/11/26 | DRY    | LC08_L1TP_216065_20171126_20200902_02_T1 | USGS     |

## APPENDIX SD – Summary of model selection statistics from GLMMs

**Table S4.** Summary of model selection statistics from GLMMs selected by species according to Akaike criteria as a function of landscape features.  $\Delta AICc$  represents the AIC distance; df represents degrees of freedom;  $\beta$ : Regression coefficient; wAICc represents how much the model explain de variables related to all other models.

| <b>Mammals</b>                                                                                                                       |               |             |                                 |           |              |  |
|--------------------------------------------------------------------------------------------------------------------------------------|---------------|-------------|---------------------------------|-----------|--------------|--|
| <b>Model</b>                                                                                                                         | <b>Buffer</b> | <b>AICc</b> | <b><math>\Delta AICc</math></b> | <b>df</b> | <b>wAICc</b> |  |
| model_den_veget_urb_inf_per_int = glmer(N_ ROADKILL~den_veget * urb_inf + period + UC + (1 year) + (1  road/km), family = 'poisson') | 5 km          | 1268.1      | 0.0                             | 9         | 0.9984       |  |
| model_wetland_urb_inf_per_int = glmer(N_ ROADKILL~ wetland * urb_inf + period + UC + (1  year) + (1  road/km), family = 'poisson')   | 5 km          | 1281.3      | 13.2                            | 9         | 0.0014       |  |
| model_water_urb_inf_per_int = glmer(N_ ROADKILL~ water * urb_inf + period + UC + (1  year) + (1  road/km), family = 'poisson')       | 5 km          | 1287.3      | 19.1                            | 9         | <0.001       |  |
| model_wetland_urb_inf_per_int = glmer(N_ ROADKILL~ wetland * urb_inf + period + UC + (1 year) + (1  road/km), family = 'poisson')    | 1 km          | 1288.4      | 20.3                            | 9         | <0.001       |  |
| model_wetland_urb_inf_per = glmer(N_ ROADKILL~ wetland + urb_inf + period + UC + (1 year) + (1  road/km), family = 'poisson')        | 1 km          | 1290.0      | 21.8                            | 8         | <0.001       |  |
| model_wetland_urb_inf_per = glmer(N_ ROADKILL~ wetland + urb_inf + period + UC + (1 year) + (1  road/km), family = 'poisson')        | 5 km          | 1290.7      | 22.6                            | 8         | <0.001       |  |
| model_spa_veget_urb_inf_per_int = glmer(N_ ROADKILL~spa_veget * urb_inf + period + UC + (1 year) + (1  road/km), family = 'poisson') | 5 km          | 1291.3      | 23.2                            | 9         | <0.001       |  |
| model_den_veget_urb_inf_per = glmer(N_ ROADKILL~den_veget + urb_inf + period + UC + (1 year) + (1  road/km), family = 'poisson')     | 5 km          | 1292.7      | 24.8                            | 8         | <0.001       |  |
| model_farming_urb_inf_per_int = glmer(N_ ROADKILL~farming * urb_inf + period + UC + (1 year) + (1  road/km), family = 'poisson')     | 5 km          | 1293.1      | 25.0                            | 9         | <0.001       |  |
| model_farming_urb_inf_per = glmer(N_ ROADKILL~farming + urb_inf + period + UC + (1 year) + (1  road/km), family = 'poisson')         | 5 km          | 1294.0      | 25.9                            | 8         | <0.001       |  |
| <b><i>C. thous</i></b>                                                                                                               |               |             |                                 |           |              |  |
| <b>Model</b>                                                                                                                         | <b>Buffer</b> | <b>AICc</b> | <b><math>\Delta AICc</math></b> | <b>df</b> | <b>wAICc</b> |  |
| model_den_veget_urb_inf_per_int = glmer(N_ ROADKILL~den_veget * urb_inf + period + UC + (1 year) + (1  road/km), family = 'poisson') | 1km           | 2669.5      | 0.0                             | 9         | 0.7813       |  |
| model_farming_urb_inf_per = glmer(N_ ROADKILL~farming + urb_inf + period + UC + (1 year) + (1  road/km), family = 'poisson')         | 1km           | 2672.7      | 3.2                             | 8         | 0.1580       |  |
| model_farming_urb_inf_per_int = glmer(N_ ROADKILL~farming * urb_inf + period + UC + (1 year) + (1  road/km), family = 'poisson')     | 1km           | 2674.7      | 5.2                             | 9         | 0.0573       |  |
| model_exp_soil_urb_inf_per_int = glmer(N_ ROADKILL~exp_soil * urb_inf + period + UC + (1 year) + (1  road/km), family = 'poisson')   | 1km           | 2682.6      | 13.1                            | 9         | 0.0011       |  |
| model_exp_soil_urb_inf_per = glmer(N_ ROADKILL~exp_soil + urb_inf + period + UC + (1 year) + (1  road/km), family = 'poisson')       | 1km           | 2684.4      | 14.9                            | 8         | <0.001       |  |
| model_spa_veget_urb_inf_per = glmer(N_ ROADKILL~spa_veget + urb_inf + period + UC + (1 year) + (1  road/km), family = 'poisson')     | 1km           | 2685.0      | 15.5                            | 8         | <0.001       |  |
| model_wetland_urb_inf_per_int = glmer(N_ ROADKILL~ wetland * urb_inf + period + UC + (1 year) + (1  road/km), family = 'poisson')    | 1km           | 2685.2      | 15.7                            | 9         | <0.001       |  |
| model_den_veget_urb_inf_per = glmer(N_ ROADKILL~den_veget + urb_inf + period + UC + (1 year) + (1  road/km), family = 'poisson')     | 1km           | 2686.1      | 16.6                            | 8         | <0.001       |  |
| model_spa_veget_urb_inf_per_int = glmer(N_ ROADKILL~spa_veget * urb_inf + period + UC + (1 year) + (1  road/km), family = 'poisson') | 1km           | 2686.1      | 16.6                            | 9         | <0.001       |  |
| model_wetland_urb_inf_per = glmer(N_ ROADKILL~ wetland + urb_inf + period + UC + (1 year) + (1  road/km), family = 'poisson')        | 1km           | 2686.2      | 16.7                            | 8         | <0.001       |  |
| <b><i>P. cancrivorus</i></b>                                                                                                         |               |             |                                 |           |              |  |
| <b>Model</b>                                                                                                                         | <b>Buffer</b> | <b>AICc</b> | <b><math>\Delta AICc</math></b> | <b>df</b> | <b>wAICc</b> |  |
| model_exp_soil_urb_inf_per = glmer(N_ ROADKILL~exp_soil + urb_inf + period + UC + (1 year) + (1  road/km), family = 'poisson')       | 1 km          | 551.8       | 0.0                             | 8         | 0.5792       |  |
| model_exp_soil_urb_inf_per_int = glmer(N_ ROADKILL~exp_soil * urb_inf + period + UC + (1 year) + (1  road/km), family = 'poisson')   | 1 km          | 553.0       | 1.2                             | 9         | 0.3166       |  |
| model_water_exp_soil_per_int = glmer(N_ ROADKILL~water * exp_soil + period + UC + (1 year) + (1  road/km), family = 'poisson')       | 5 km          | 556.6       | 4.8                             | 9         | 0.0513       |  |
| model_exp_soil_urb_inf_per = glmer(N_ ROADKILL~exp_soil + urb_inf + period + UC + (1 year) + (1  road/km), family = 'poisson')       | 5 km          | 559.3       | 7.5                             | 8         | 0.0133       |  |
| model_wetland_urb_inf_per = glmer(N_ ROADKILL~ wetland + urb_inf + period + UC + (1 year) + (1  road/km), family = 'poisson')        | 1 km          | 560.1       | 8.3                             | 8         | 0.0089       |  |

|                                                                                                                                       |      |       |      |   |        |
|---------------------------------------------------------------------------------------------------------------------------------------|------|-------|------|---|--------|
| model_wetland_urb_inf_per_int = glmer(N_ ROADKILL~ wetland *<br>urb_inf + period + UC + (1 year) + (1  road/km), family = 'poisson')  | 1 km | 560.8 | 9.0  | 9 | 0.0066 |
| model_exp_soil_urb_inf_per_int = glmer(N_ ROADKILL~exp_soil *<br>urb_inf + period + UC + (1 year) + (1  road/km), family = 'poisson') | 5 km | 561.2 | 9.4  | 9 | 0.0053 |
| model_water_urb_inf_per = glmer(N_ ROADKILL~ water + urb_inf +<br>period + UC + (1 year) + (1  road/km), family = 'poisson')          | 5 km | 561.7 | 9.9  | 8 | 0.0041 |
| model_spa_veget_urb_inf_per = glmer(N_ ROADKILL~spa_veget +<br>urb_inf + period + UC + (1 year) + (1  road/km), family = 'poisson')   | 5 km | 562.0 | 10.2 | 8 | 0.0036 |
| model_den_veget_urb_inf_per = glmer(N_ ROADKILL~den_veget +<br>urb_inf + period + UC + (1 year) + (1  road/km), family = 'poisson')   | 5 km | 562.5 | 10.7 | 8 | 0.0028 |

### *E. sexcinctus*

| Model                                                                                                                                   | Buffer | AICc  | ΔAICc | df | wAICc  |
|-----------------------------------------------------------------------------------------------------------------------------------------|--------|-------|-------|----|--------|
| model_spa_veget_urb_inf_per = glmer(N_ ROADKILL~spa_veget +<br>urb_inf + period + UC + (1 year) + (1  road/km), family = 'poisson')     | 1 km   | 479.7 | 0.0   | 8  | 0.5092 |
| model_spa_veget_urb_inf_per_int = glmer(N_ ROADKILL~spa_veget<br>* urb_inf + period + UC + (1 year) + (1  road/km), family = 'poisson') | 1 km   | 480.0 | 0.4   | 9  | 0.4200 |
| model_farming_urb_inf_per = glmer(N_ ROADKILL~farming + urb_inf<br>+ period + UC + (1 year) + (1  road/km), family = 'poisson')         | 1 km   | 486.1 | 6.4   | 8  | 0.0203 |
| model_wetland_urb_inf_per_int = glmer(N_ ROADKILL~ wetland *<br>urb_inf + period + UC + (1 year) + (1  road/km), family = 'poisson')    | 1 km   | 486.9 | 7.3   | 9  | 0.0135 |
| model_farming_urb_inf_per_int = glmer(N_ ROADKILL~farming *<br>urb_inf + period + UC + (1 year) + (1  road/km), family = 'poisson')     | 1 km   | 488.1 | 8.5   | 9  | 0.0073 |
| model_wetland_urb_inf_per = glmer(N_ ROADKILL~ wetland +<br>urb_inf + period + UC + (1 year) + (1  road/km), family = 'poisson')        | 1 km   | 488.3 | 8.7   | 8  | 0.0067 |
| model_urb_inf = glmer(N_ ROADKILL~ urb_inf + period + UC +<br>(1 year) + (1  road/km), family = 'poisson')                              | 1 km   | 489.0 | 9.3   | 7  | 0.0048 |
| model_urb_inf_per = glmer(N_ ROADKILL~ urb_inf + period + UC +<br>(1 year) + (1  road/km), family = 'poisson')                          | 1 km   | 489.0 | 9.3   | 7  | 0.0048 |
| model_water_urb_inf_per = glmer(N_ ROADKILL~ water + urb_inf +<br>period + UC + (1 year) + (1  road/km), family = 'poisson')            | 1 km   | 489.5 | 9.9   | 8  | 0.0037 |
| model_den_veget_urb_inf_per = glmer(N_ ROADKILL~den_veget +<br>urb_inf + period + UC + (1 year) + (1  road/km), family = 'poisson')     | 1 km   | 490.4 | 10.8  | 8  | 0.0023 |
